# Supplementary material for: Physiological and behavioral response of the Asian shore crab, Hemigrapsus sanguineus, to salinity: implications for estuarine distribution and invasion
Source: PeerJ. 2018 Aug 14;6:e5446. doi: 10.7717/peerj.5446 (PMC6097503; doi:10.7717/peerj.5446)
Supplement: Supplemental Information 1 — Each data point represents the number of crabs left at a given salinity after each day, up to 14 days. [file peerj-06-5446-s010.xlsx]

## Sheet: Hemigrapsus survival
Day	Date	Tank	Treatment Salinity (PSU)	Sex	# crabs left	# deaths	# Escapes	D + E
0	2010-06-30	6	1	F	20	N/A	N/A	0
1	2010-07-01	6	1	F	18	2	0	2
2	2010-07-02	6	1	F	18	0	0	0
3	2010-07-03	6	1	F	18	0	0	0
4	2010-07-04	6	1	F	18	0	0	0
5	2010-07-05	6	1	F	13	5	0	5
6	2010-07-06	6	1	F	13	0	0	0
7	2010-07-07	6	1	F	13	0	0	0
8	2010-07-08	6	1	F	13	0	0	0
9	2010-07-09	6	1	F	13	0	0	0
10	2010-07-10	6	1	F	13	0	0	0
11	2010-07-11	6	1	F	13	0	0	0
12	2010-07-11	6	1	F	13	0	0	0
13	2010-07-11	6	1	F	13	0	0	0
14	2010-07-11	6	1	F	13	0	0	0
0	2010-06-30	5	1	M	20	N/A	N/A	0
1	2010-07-01	5	1	M	19	1	0	1
2	2010-07-02	5	1	M	17	2	0	2
3	2010-07-03	5	1	M	17	0	0	0
4	2010-07-04	5	1	M	15	2	0	2
5	2010-07-05	5	1	M	15	0	0	0
6	2010-07-06	5	1	M	15	0	0	0
7	2010-07-07	5	1	M	15	0	0	0
8	2010-07-08	5	1	M	15	0	0	0
9	2010-07-09	5	1	M	14	1	0	1
10	2010-07-10	5	1	M	14	0	0	0
11	2010-07-11	5	1	M	14	0	0	0
12	2010-07-11	5	1	M	14	0	0	0
13	2010-07-11	5	1	M	13	1	0	1
14	2010-07-11	5	1	M	13	0	0	0
0	2010-06-30	4	15	F	20	N/A	N/A	0
1	2010-07-01	4	15	F	20	0	0	0
2	2010-07-02	4	15	F	20	0	0	0
3	2010-07-03	4	15	F	20	0	0	0
4	2010-07-04	4	15	F	20	0	0	0
5	2010-07-05	4	15	F	20	0	0	0
6	2010-07-06	4	15	F	20	0	0	0
7	2010-07-07	4	15	F	20	0	0	0
8	2010-07-08	4	15	F	20	0	0	0
9	2010-07-09	4	15	F	20	0	0	0
10	2010-07-10	4	15	F	20	0	0	0
11	2010-07-11	4	15	F	20	0	0	0
12	2010-07-11	4	15	F	20	0	0	0
13	2010-07-11	4	15	F	20	0	0	0
14	2010-07-11	4	15	F	19	0	1	1
0	2010-06-30	3	15	M	20	N/A	N/A	0
1	2010-07-01	3	15	M	19	1	0	1
2	2010-07-02	3	15	M	19	0	0	0
3	2010-07-03	3	15	M	19	0	0	0
4	2010-07-04	3	15	M	18	1	0	1
5	2010-07-05	3	15	M	18	0	0	0
6	2010-07-06	3	15	M	18	0	0	0
7	2010-07-07	3	15	M	18	0	0	0
8	2010-07-08	3	15	M	18	0	0	0
9	2010-07-09	3	15	M	18	0	0	0
10	2010-07-10	3	15	M	17	0	1	1
11	2010-07-11	3	15	M	17	0	0	0
12	2010-07-11	3	15	M	17	0	0	0
13	2010-07-11	3	15	M	17	0	0	0
14	2010-07-11	3	15	M	17	0	0	0
0	2010-06-30	2	35	F	15	N/A	N/A	0
1	2010-07-01	2	35	F	15	0	0	0
2	2010-07-02	2	35	F	15	0	0	0
3	2010-07-03	2	35	F	15	0	0	0
4	2010-07-04	2	35	F	15	0	0	0
5	2010-07-05	2	35	F	15	0	0	0
6	2010-07-06	2	35	F	15	0	0	0
7	2010-07-07	2	35	F	15	0	0	0
8	2010-07-08	2	35	F	15	0	0	0
9	2010-07-09	2	35	F	15	0	0	0
10	2010-07-10	2	35	F	15	0	0	0
11	2010-07-11	2	35	F	15	0	0	0
12	2010-07-11	2	35	F	15	0	0	0
13	2010-07-11	2	35	F	15	0	0	0
14	2010-07-11	2	35	F	15	0	0	0
0	2010-06-30	1	35	M	17	N/A	N/A	0
1	2010-07-01	1	35	M	17	0	0	0
2	2010-07-02	1	35	M	17	0	0	0
3	2010-07-03	1	35	M	17	0	0	0
4	2010-07-04	1	35	M	17	0	0	0
5	2010-07-05	1	35	M	17	0	0	0
6	2010-07-06	1	35	M	17	0	0	0
7	2010-07-07	1	35	M	17	0	0	0
8	2010-07-08	1	35	M	17	0	0	0
9	2010-07-09	1	35	M	17	0	0	0
10	2010-07-10	1	35	M	17	0	0	0
11	2010-07-11	1	35	M	17	0	0	0
12	2010-07-11	1	35	M	17	0	0	0
13	2010-07-11	1	35	M	17	0	0	0
14	2010-07-11	1	35	M	17	0	0	0
0	2010-07-15	6	5	F	20	N/A	N/A	0
1	2010-07-16	6	5	F	20	0	0	0
2	2010-07-17	6	5	F	19	1	0	1
3	2010-07-18	6	5	F	19	0	0	0
4	2010-07-19	6	5	F	19	0	0	0
5	2010-07-20	6	5	F	19	0	0	0
6	2010-07-21	6	5	F	19	0	0	0
7	2010-07-22	6	5	F	19	0	0	0
8	2010-07-23	6	5	F	18	0	1	1
9	2010-07-24	6	5	F	18	0	0	0
10	2010-07-25	6	5	F	16	2	0	2
11	2010-07-26	6	5	F	16	0	0	0
12	2010-07-27	6	5	F	16	0	0	0
13	2010-07-28	6	5	F	16	0	0	0
14	2010-07-29	6	5	F	16	0	0	0
0	2010-07-15	5	5	M	20	N/A	N/A	0
1	2010-07-16	5	5	M	18	2	0	2
2	2010-07-17	5	5	M	18	0	0	0
3	2010-07-18	5	5	M	18	0	0	0
4	2010-07-19	5	5	M	18	0	0	0
5	2010-07-20	5	5	M	18	0	0	0
6	2010-07-21	5	5	M	18	0	0	0
7	2010-07-22	5	5	M	18	0	0	0
8	2010-07-23	5	5	M	18	0	0	0
9	2010-07-24	5	5	M	18	0	0	0
10	2010-07-25	5	5	M	19	0	0	0
11	2010-07-26	5	5	M	18	1	0	1
12	2010-07-27	5	5	M	18	0	0	0
13	2010-07-28	5	5	M	18	0	0	0
14	2010-07-29	5	5	M	17	1	0	1
0	2010-07-15	4	10	F	20	N/A	N/A	0
1	2010-07-16	4	10	F	20	0	0	0
2	2010-07-17	4	10	F	19	1	0	1
3	2010-07-18	4	10	F	19	0	0	0
4	2010-07-19	4	10	F	19	0	0	0
5	2010-07-20	4	10	F	18	1	0	1
6	2010-07-21	4	10	F	18	0	0	0
7	2010-07-22	4	10	F	18	0	0	0
8	2010-07-23	4	10	F	18	0	0	0
9	2010-07-24	4	10	F	18	0	0	0
10	2010-07-25	4	10	F	18	0	0	0
11	2010-07-26	4	10	F	18	0	0	0
12	2010-07-27	4	10	F	18	0	0	0
13	2010-07-28	4	10	F	18	0	0	0
14	2010-07-29	4	10	F	18	0	0	0
0	2010-07-15	3	10	M	20	N/A	N/A	0
1	2010-07-16	3	10	M	19	0	1	1
2	2010-07-17	3	10	M	21	0	0	0
3	2010-07-18	3	10	M	20	0	1	1
4	2010-07-19	3	10	M	20	0	0	0
5	2010-07-20	3	10	M	20	0	0	0
6	2010-07-21	3	10	M	20	0	0	0
7	2010-07-22	3	10	M	20	0	0	0
8	2010-07-23	3	10	M	20	0	0	0
9	2010-07-24	3	10	M	20	0	0	0
10	2010-07-25	3	10	M	20	0	0	0
11	2010-07-26	3	10	M	19	0	1	1
12	2010-07-27	3	10	M	19	0	0	0
13	2010-07-28	3	10	M	18	0	0	0
14	2010-07-29	3	10	M	19	0	0	0
