# Supplementary material for: Physiological and behavioral response of the Asian shore crab, Hemigrapsus sanguineus, to salinity: implications for estuarine distribution and invasion
Source: PeerJ. 2018 Aug 14;6:e5446. doi: 10.7717/peerj.5446 (PMC6097503; doi:10.7717/peerj.5446)
Supplement: Supplemental Information 3 — Each data point represents the hemolymph osmolality measured for an individual H. sanguineus crab, with information about how long the animal was exposed and what salinity treatment the animal was subjected to. [file peerj-06-5446-s012.xlsx]

## Sheet: H.s. Osmolality PeerJ
Date	Sample Timing (Hours)	Animal ID	Species	Treatment (PSU)	Osmolality (mmol/K)
2009-06-29	1	H.s. 11	Hemigrapsus sanguineus	5	353
2009-06-29	1	H.s. 12	Hemigrapsus sanguineus	5	203
2009-06-29	1	H.s. 13	Hemigrapsus sanguineus	5	629
2009-06-29	1	H.s. 14	Hemigrapsus sanguineus	5	506
2009-06-29	1	H.s. 15	Hemigrapsus sanguineus	5	342
2009-06-29	2	H.s. 21	Hemigrapsus sanguineus	5	371.5
2009-06-29	2	H.s. 22	Hemigrapsus sanguineus	5	225
2009-06-29	2	H.s. 23	Hemigrapsus sanguineus	5	369.5
2009-06-29	2	H.s. 24	Hemigrapsus sanguineus	5	353.5
2009-06-29	2	H.s. 25	Hemigrapsus sanguineus	5	546
2009-06-29	4	H.s. 31	Hemigrapsus sanguineus	5	518.5
2009-06-29	4	H.s. 32	Hemigrapsus sanguineus	5	409
2009-06-29	4	H.s. 33	Hemigrapsus sanguineus	5	540
2009-06-29	4	H.s. 34	Hemigrapsus sanguineus	5	504
2009-06-29	4	H.s. 35	Hemigrapsus sanguineus	5	347.5
2009-06-29	8	H 41	Hemigrapsus sanguineus	5	320.5
2009-06-29	8	H 42	Hemigrapsus sanguineus	5	183.5
2009-06-29	8	H 43	Hemigrapsus sanguineus	5	363
2009-06-29	8	H 44	Hemigrapsus sanguineus	5	249
2009-06-29	8	H 45	Hemigrapsus sanguineus	5	367.5
2009-06-30	24	H 51	Hemigrapsus sanguineus	5	411.5
2009-06-30	24	H 52	Hemigrapsus sanguineus	5	521.5
2009-06-30	24	H 53	Hemigrapsus sanguineus	5	567
2009-06-30	24	H 54	Hemigrapsus sanguineus	5	537
2009-06-30	24	H 55	Hemigrapsus sanguineus	5	633.5
2009-07-01	48	H 61	Hemigrapsus sanguineus	5	655
2009-07-01	48	H 62	Hemigrapsus sanguineus	5	119.5
2009-07-01	48	H 63	Hemigrapsus sanguineus	5	482.5
2009-07-01	48	H 64	Hemigrapsus sanguineus	5	356
2009-07-01	48	H 65	Hemigrapsus sanguineus	5	93.5
2009-07-02	72	H 71	Hemigrapsus sanguineus	5	277
2009-07-02	72	H 72	Hemigrapsus sanguineus	5	470
2009-07-02	72	H 73	Hemigrapsus sanguineus	5	460
2009-07-02	72	H 74	Hemigrapsus sanguineus	5	343.5
2009-07-02	72	H 75	Hemigrapsus sanguineus	5	451.5
2009-07-06	168	H 81	Hemigrapsus sanguineus	5	284.5
2009-07-06	168	H 82	Hemigrapsus sanguineus	5	130.5
2009-07-06	168	H 83	Hemigrapsus sanguineus	5	234.5
2009-07-06	168	H 84	Hemigrapsus sanguineus	5	193.5
2009-07-06	168	H 85	Hemigrapsus sanguineus	5	80.5
2009-07-08	1	H96	Hemigrapsus sanguineus	10	310.5
2009-07-08	1	H97	Hemigrapsus sanguineus	10	264.5
2009-07-08	1	H98	Hemigrapsus sanguineus	10	173.5
2009-07-08	1	H99	Hemigrapsus sanguineus	10	107.5
2009-07-08	1	H100	Hemigrapsus sanguineus	10	293
2009-07-08	2	H106	Hemigrapsus sanguineus	10	218.5
2009-07-08	2	H107	Hemigrapsus sanguineus	10	593
2009-07-08	2	H108	Hemigrapsus sanguineus	10	405.5
2009-07-08	2	H109	Hemigrapsus sanguineus	10	354
2009-07-08	2	H110	Hemigrapsus sanguineus	10	241.5
2009-07-08	4	H116	Hemigrapsus sanguineus	10	429.5
2009-07-08	4	H117	Hemigrapsus sanguineus	10	475
2009-07-08	4	H118	Hemigrapsus sanguineus	10	566
2009-07-08	4	H119	Hemigrapsus sanguineus	10	315.5
2009-07-08	4	H120	Hemigrapsus sanguineus	10	329.5
2009-07-08	8	H 126	Hemigrapsus sanguineus	10	290
2009-07-08	8	H 127	Hemigrapsus sanguineus	10	173.5
2009-07-08	8	H 128	Hemigrapsus sanguineus	10	234.5
2009-07-08	8	H 129	Hemigrapsus sanguineus	10	470.5
2009-07-08	8	H 130	Hemigrapsus sanguineus	10	597.5
2009-07-09	24	H 136	Hemigrapsus sanguineus	10	504.5
2009-07-09	24	H 137	Hemigrapsus sanguineus	10	587.5
2009-07-09	24	H 138	Hemigrapsus sanguineus	10	653
2009-07-09	24	H 139	Hemigrapsus sanguineus	10	489
2009-07-09	24	H 140	Hemigrapsus sanguineus	10	328
2009-07-10	48	H 146	Hemigrapsus sanguineus	10	261
2009-07-10	48	H 147	Hemigrapsus sanguineus	10	514
2009-07-10	48	H 148	Hemigrapsus sanguineus	10	279
2009-07-10	48	H 149	Hemigrapsus sanguineus	10	344
2009-07-10	48	H 150	Hemigrapsus sanguineus	10	191
2009-07-11	72	H 156	Hemigrapsus sanguineus	10	693
2009-07-11	72	H 157	Hemigrapsus sanguineus	10	367.5
2009-07-11	72	H 158	Hemigrapsus sanguineus	10	589.5
2009-07-11	72	H 159	Hemigrapsus sanguineus	10	677
2009-07-11	72	H 160	Hemigrapsus sanguineus	10	637
2009-07-15	168	H 166	Hemigrapsus sanguineus	10	745
2009-07-15	168	H 167	Hemigrapsus sanguineus	10	678.5
2009-07-15	168	H 168	Hemigrapsus sanguineus	10	560.5
2009-07-15	168	H 169	Hemigrapsus sanguineus	10	593
2009-07-15	168	H 170	Hemigrapsus sanguineus	10	372
2009-06-29	1	H.s. 6	Hemigrapsus sanguineus	17.5	617
2009-06-29	1	H.s. 7	Hemigrapsus sanguineus	17.5	317.5
2009-06-29	1	H.s. 8	Hemigrapsus sanguineus	17.5	792.5
2009-06-29	1	H.s. 9	Hemigrapsus sanguineus	17.5	456.5
2009-06-29	1	H.s. 10	Hemigrapsus sanguineus	17.5	536.5
2009-06-29	2	H.s. 16	Hemigrapsus sanguineus	17.5	278.5
2009-06-29	2	H.s. 17	Hemigrapsus sanguineus	17.5	341
2009-06-29	2	H.s. 18	Hemigrapsus sanguineus	17.5	192
2009-06-29	2	H.s. 19	Hemigrapsus sanguineus	17.5	512.5
2009-06-29	2	H.s. 20	Hemigrapsus sanguineus	17.5	209.5
2009-06-29	4	H.s. 26	Hemigrapsus sanguineus	17.5	545
2009-06-29	4	H.s. 27	Hemigrapsus sanguineus	17.5	605
2009-06-29	4	H.s. 28	Hemigrapsus sanguineus	17.5	730
2009-06-29	4	H.s. 29	Hemigrapsus sanguineus	17.5	572.5
2009-06-29	4	H.s. 30	Hemigrapsus sanguineus	17.5	719
2009-06-29	8	H 36	Hemigrapsus sanguineus	17.5	518.5
2009-06-29	8	H 37	Hemigrapsus sanguineus	17.5	505.5
2009-06-29	8	H 38	Hemigrapsus sanguineus	17.5	536.5
2009-06-29	8	H 39	Hemigrapsus sanguineus	17.5	489
2009-06-29	8	H 40	Hemigrapsus sanguineus	17.5	434.5
2009-06-30	24	H 46	Hemigrapsus sanguineus	17.5	682
2009-06-30	24	H 47	Hemigrapsus sanguineus	17.5	488
2009-06-30	24	H 48	Hemigrapsus sanguineus	17.5	314.5
2009-06-30	24	H 49	Hemigrapsus sanguineus	17.5	454.5
2009-06-30	24	H 50	Hemigrapsus sanguineus	17.5	442
2009-07-01	48	H 56	Hemigrapsus sanguineus	17.5	301
2009-07-01	48	H 57	Hemigrapsus sanguineus	17.5	752.5
2009-07-01	48	H 58	Hemigrapsus sanguineus	17.5	750.5
2009-07-01	48	H 59	Hemigrapsus sanguineus	17.5	429
2009-07-01	48	H 60	Hemigrapsus sanguineus	17.5	547.5
2009-07-02	72	H 66	Hemigrapsus sanguineus	17.5	590
2009-07-02	72	H 67	Hemigrapsus sanguineus	17.5	439.5
2009-07-02	72	H 68	Hemigrapsus sanguineus	17.5	668.5
2009-07-02	72	H 69	Hemigrapsus sanguineus	17.5	336.5
2009-07-02	72	H 70	Hemigrapsus sanguineus	17.5	437
2009-07-06	168	H 76	Hemigrapsus sanguineus	17.5	532.5
2009-07-06	168	H 77	Hemigrapsus sanguineus	17.5	672.5
2009-07-06	168	H 78	Hemigrapsus sanguineus	17.5	837
2009-07-06	168	H 79	Hemigrapsus sanguineus	17.5	400.5
2009-07-06	168	H 80	Hemigrapsus sanguineus	17.5	369.5
2009-07-08	0	H 91	Hemigrapsus sanguineus	32	506.5
2009-07-08	0	H 92	Hemigrapsus sanguineus	32	406
2009-07-08	0	H 93	Hemigrapsus sanguineus	32	461
2009-07-08	0	H 94	Hemigrapsus sanguineus	32	535
2009-07-08	0	H 95	Hemigrapsus sanguineus	32	351.5
2009-07-08	1	H 101	Hemigrapsus sanguineus	32	152.5
2009-07-08	1	H 102	Hemigrapsus sanguineus	32	579
2009-07-08	1	H 103	Hemigrapsus sanguineus	32	381
2009-07-08	1	H 104	Hemigrapsus sanguineus	32	667.5
2009-07-08	1	H 105	Hemigrapsus sanguineus	32	342
2009-07-08	2	H 111	Hemigrapsus sanguineus	32	703.5
2009-07-08	2	H 112	Hemigrapsus sanguineus	32	349
2009-07-08	2	H 113	Hemigrapsus sanguineus	32	349.5
2009-07-08	2	H 114	Hemigrapsus sanguineus	32	501
2009-07-08	2	H 115	Hemigrapsus sanguineus	32	366
2009-07-08	4	H 121	Hemigrapsus sanguineus	32	554.5
2009-07-08	4	H 122	Hemigrapsus sanguineus	32	419.5
2009-07-08	4	H 123	Hemigrapsus sanguineus	32	523
2009-07-08	4	H 124	Hemigrapsus sanguineus	32	268
2009-07-08	4	H 125	Hemigrapsus sanguineus	32	417
2009-07-08	8	H 131	Hemigrapsus sanguineus	32	304.5
2009-07-08	8	H 132	Hemigrapsus sanguineus	32	296
2009-07-08	8	H 133	Hemigrapsus sanguineus	32	456.5
2009-07-08	8	H 134	Hemigrapsus sanguineus	32	441.5
2009-07-08	8	H 135	Hemigrapsus sanguineus	32	563.5
2009-07-09	24	H 141	Hemigrapsus sanguineus	32	296.5
2009-07-09	24	H 142	Hemigrapsus sanguineus	32	723
2009-07-09	24	H 143	Hemigrapsus sanguineus	32	586
2009-07-09	24	H 144	Hemigrapsus sanguineus	32	766
2009-07-09	24	H 145	Hemigrapsus sanguineus	32	690
2009-07-10	48	H 151	Hemigrapsus sanguineus	32	447
2009-07-10	48	H 152	Hemigrapsus sanguineus	32	485
2009-07-10	48	H 153	Hemigrapsus sanguineus	32	813
2009-07-10	48	H 154	Hemigrapsus sanguineus	32	629
2009-07-10	48	H 155	Hemigrapsus sanguineus	32	821
2009-07-11	72	H 161	Hemigrapsus sanguineus	32	840.5
2009-07-11	72	H 162	Hemigrapsus sanguineus	32	729
2009-07-11	72	H 163	Hemigrapsus sanguineus	32	737
2009-07-11	72	H 164	Hemigrapsus sanguineus	32	861
2009-07-11	72	H 165	Hemigrapsus sanguineus	32	531
2009-07-15	168	H 171	Hemigrapsus sanguineus	32	844.5
2009-07-15	168	H 172	Hemigrapsus sanguineus	32	709.5
2009-07-15	168	H 173	Hemigrapsus sanguineus	32	500.5
2009-07-15	168	H 174	Hemigrapsus sanguineus	32	709.5
2009-07-15	168	H 175	Hemigrapsus sanguineus	32	434.5
